# Supplementary material for: Risk prediction models for maternal mortality: A systematic review and meta-analysis
Source: PubMed Central journal article supplement (PMC6279047; doi:10.1371/journal.pone.0208563), 2018-12-04
Supplement: pone.0208563.s001.pdf [file pone.0208563.s001.pdf]

| Author                                                                                                                                                                            | Title                                                                                                                                                                     | Journal                                                            | Year | Reason for exclusion                          |
|-----------------------------------------------------------------------------------------------------------------------------------------------------------------------------------|---------------------------------------------------------------------------------------------------------------------------------------------------------------------------|--------------------------------------------------------------------|------|-----------------------------------------------|
| Adeniran, A. S., Bolaji, B. O., Fawole, A. A. and Oyedepo, O. O.                                                                                                                  | Predictors of maternal mortality among critically ill obstetric patients                                                                                                  | Malawi Medical Journal                                             | 2015 | No Performance of Models Reported             |
| Ahmed,N. K. A.;Makki,M.;Mahmoud,S.;Amu,O.                                                                                                                                         | Maternal near-miss in a UK district hospital: 5 year review of critical care admissions                                                                                   | BJOG: An International Journal of Obstetrics and Gynaecology       | 2013 | Conference abstract                           |
| Ashraf,N.;Mishra,S. K.;Kundra,P.;Veena,P.;Soundaraghavan,S.;Habeebullah,S.                                                                                                        | Obstetric patients requiring intensive care: A one year retrospective study in a tertiary care institute in India                                                         | Anesthesiology Research and Practice                               | 2014 | No Performance of Models Reported             |
| Bateman,B. T.;Mhyre,J. M.;Hernandez-Diaz,S.;Huybrechts,K. F.;Fischer,M. A.;Creanga,A. A.;Callaghan,W. M.;Gagne,J. J. Bhadade,R.;De'Souza,R.;More,A.;Harde,M.                      | Development of a comorbidity index for use in obstetric patients                                                                                                          | Obstetrics and gynecology                                          | 2013 | No models investigated or comorbidity indexes |
| Bhagwanjee,S.;Paruk,F.;Moodley,J.;Muckart,D. J.                                                                                                                                   | Maternal outcomes in critically ill obstetrics patients: A unique challenge                                                                                               | Indian Journal of Critical Care Medicine                           | 2012 | No Performance of Models Reported             |
| Bouvier-Colle,M.;Salanave,B.;Ancel,P. Y.;Varnoux,N.;Fernandez,H.;Papiernik,E.;Breart,G.;Benhamou,D.;Boutroy,P.;Caillier,I.;Dumoulin,M.;Fournet,P.;Elhassani,M.;Puech,F.;Poutot,C. | Intensive care unit morbidity and mortality from eclampsia: an evaluation of the Acute Physiology and Chronic Health Evaluation II score and the Glasgow Coma Scale score | Critical care medicine                                             | 2000 | Specific disease                              |
| Crozier, T. M.;Wallace,E. M.                                                                                                                                                      | Obstetric patients treated in intensive care units and maternal mortality. Regional Teams for the Survey                                                                  | European Journal of Obstetrics, Gynecology, & Reproductive Biology | 1996 | No Performance of Models Reported             |
| Czechowski,M.;Duda,I.;Gronska,E.                                                                                                                                                  | Obstetric admissions to an integrated general intensive care unit in a quaternary maternity facility                                                                      | Australian & New Zealand Journal of Obstetrics & Gynaecology       | 2011 | No Performance of Models Reported             |
| Das Neves,A.;Vasquez,D. N.;Intile,D.;Cicora,F.;Saenz,M. G.;Loudet,C.;Canales,H.;Casanova,M.;Aphalo,V.;Balasini,C.;Scappellato,J. L.;Reina,R.;Savero,J.;Desmery,P.;Estenssoro,E.   | Critical care management and outcomes of obstetrics patients in intensive care unit                                                                                       | Intensive care medicine                                            | 2011 | Conference abstract                           |
| Demirkiran,O.;Dikmen,Y.;Utku,T.;Urkmez,S.                                                                                                                                         | Outcome and level of intervention of critically ill obstetric patients from the public health sector vs. the private health sector: Prospective cohort                    | American Journal of Respiratory and Critical Care Medicine         | 2011 | Conference abstract                           |
| Dennis,A.T.; Chambers,E.                                                                                                                                                          | Critically ill obstetric patients in the intensive care unit                                                                                                              | International Journal of Obstetric Anesthesia                      | 2003 | No Performance of Models Reported             |
| El Ayadi, A. M.; Nathan,H.L.; Seed,P.T.; Butrick,E.A.; Hezelgrave,N.L.; Shennan,A.H.; Miller,S.                                                                                   | Maternal morbidity: An analysis of high dependency unit care in pregnant or recently pregnant women                                                                       | International Journal of Obstetric Anesthesia                      | 2016 | Conference abstract                           |
| El-Ayadi, A., Nathan, H. L., Seed, P. T., et al.                                                                                                                                  | Vital Sign Prediction of Adverse Maternal Outcomes in Women with Hypovolemic Shock: The Role of Shock Index                                                               | PLOS ONE                                                           | 2016 | Specific disease                              |
| Eppes, C. S., Schupp, J. and Dildy, G.                                                                                                                                            | Vital sign prediction of adverse maternal outcomes in women with hypovolemic shock: The role of shock index                                                               | PLOS ONE                                                           | 2015 | Specific disease                              |
| Friedman, A. M. Geller,S. E.;Rosenberg,D.;Cox,S. M.;Brown,M. L.;Simonson,L.;Driscoll,C. A.;Kilpatrick,S. J.                                                                       | Shock index: A potential criterion for a maternal early warning system                                                                                                    | American Journal of Obstetrics and Gynecology                      | 2016 | Conference abstract                           |
| Gopal,G.;Gatongi,D. K.;Kamat,A.;Nicoll,A.                                                                                                                                         | Maternal Early Warning Systems                                                                                                                                            | Obstet Gynecol Clin N Am                                           | 2015 | Review                                        |
| Geller,S. E.;Rosenberg,D.;Cox,S.;Brown,M.;Simonson,L.                                                                                                                             | The continuum of maternal morbidity and mortality: Factors associated with severity                                                                                       | American Journal of Obstetrics and Gynecology                      | 2004 | Models not for predicting mortality           |
| Gopal,G.;Gatongi,D. K.;Kamat,A.;Nicoll,A.                                                                                                                                         | A scoring system identified near-miss maternal morbidity during pregnancy                                                                                                 | Journal of clinical epidemiology                                   | 2004 | Models not for predicting mortality           |
| Gopal,G.;Gatongi,D. K.;Kamat,A.;Nicoll,A.                                                                                                                                         | Maternal intensive care unit (ICU) admissions in obstetrics: Indications and outcome                                                                                      | Journal of Obstetrics and Gynaecology                              | 2010 | Conference abstract                           |

|                                                                        |                                                                                                                                                               |                                                                                                      |      |                                               |
|------------------------------------------------------------------------|---------------------------------------------------------------------------------------------------------------------------------------------------------------|------------------------------------------------------------------------------------------------------|------|-----------------------------------------------|
| Guleria,K.;Jain,S.;Ahuja,S.;Suneja,A.;Vaid,N. B.                       | Sequential organ failure assessment score for evaluating outcome in obstetric cases admitted to intensive care unit                                           | BJOG: An International Journal of Obstetrics and Gynaecology                                         | 2014 | Conference abstract                           |
| Hedriana,H.L.; Wiesner,S.; Downs,B.G.; Pelletreau,B.; Shields,L.E.     | Baseline assessment of a hospital-specific early warning trigger system for reducing maternal morbidity                                                       | International Journal of Gynecology and Obstetrics                                                   | 2016 | Models not for predicting mortality           |
| Heinonen,S.;Tyrvaainen,E.;Saarikoski,S.;Ruokonen,E.                    | Need for maternal critical care in obstetrics: A population-based analysis                                                                                    | International Journal of Obstetric Anesthesia                                                        | 2002 | No Performance of Models Reported             |
| Kainiemi,E.K.; Lavonen,L.                                              | Need for intensive care for obstetric patients in Turku university hospital and in central Finland central hospital 2009-2013                                 | Acta Anaesthesiologica Scandinavica                                                                  | 2015 | Conference abstract                           |
| Kamal,E. M.;Behery,M. M. E.;Sayed,G. A. E.;Abdulatif,H. K.             | RIFLE classification and mortality in obstetric patients admitted to the intensive care unit with acute kidney injury: A 3-year prospective study             | Reproductive Sciences                                                                                | 2014 | Specific disease                              |
| Kelebek Girgin,N.;Iscimen,R.;Otlar,B.;Kahveci,S. F.;Ozcan,B.           | An analysis of obstetric patients treated in the intensive care unit. Turkish] Yogun bakim unitesinde tedaviedilen obstetrik olgularin analizi                | Anestezi Dergisi                                                                                     | 2006 | Conference abstract                           |
| Khan,M. S.;Sultana,T.                                                  | Is delayed ICU referral associated with adverse maternal outcome? A study at tertiary level hospital in India                                                 | International Journal of Gynecology and Obstetrics                                                   | 2012 | Conference abstract                           |
| Lam,G.K.                                                               | Obesity and the Critical Care Pregnant Patient                                                                                                                | Obstetrics and gynecology clinics of North America                                                   | 2016 | Review                                        |
| Lapinsky,S. E.;Kruczynski,K.;Seaward,G. R.;Farine,D.;Grossman,R. F.    | Critical care management of the obstetric patient                                                                                                             | Canadian Journal of Anaesthesia                                                                      | 1997 | No Performance of Models Reported             |
| Lelong,E.;Pourrat,O.;Pinsard,M.;Goudet,V.;Bardin,J.;Mimoz,O.;Pierre,F. | Admission of women to an intensive care unit during pregnancy or the postpartum period: circumstances and prognosis. A retrospective series of 96 cases]      | Revue de Medecine Interne                                                                            | 2013 | No Performance of Models Reported             |
| Lenz-Gebhart,A.;Hamat,I.;Rabl,M.;Pateisky,N.;Lehner,R.                 | Morbidity and mortality of obstetric patients admitted to the ICU of a tertiary hospital                                                                      | Archives of Gynecology and Obstetrics                                                                | 2010 | Conference abstract                           |
| Lima,H.M.; Carvalho,F.H.; Feitosa,F.E.; Nunes,G.C.                     | Factors associated with maternal mortality among patients meeting criteria of severe maternal morbidity and near miss                                         | Int J Gynaecol Obstet                                                                                | 2017 | No models investigated or comorbidity indexes |
| Lin,Y.;Zhu,X.;Liu,F.;Zhao,Y. Y.;Du,J.;Yao,G. Q.;Li,W. X.;Jia,X. J.     | Analysis of risk factors of prolonged intensive care unit stay of critically ill obstetric patients: a 5-year retrospective review in 3 hospitals in Beijing] | Zhongguo Wei Zhong Bing Ji Jiu Yi Xue/Chinese Critical Care Medicine/Zhongguo Weizhongbing Jijuyixue | 2011 | No Performance of Models Reported             |
| Lomas,C.;Sacanell,J.;Roca,O.;Masclans,J. R.;Rello,J.                   | Obstetric patients requiring ICU admission. A fifteen-year review                                                                                             | Intensive care medicine                                                                              | 2010 | Conference abstract                           |
| Lopes,A. P.;Reis,Z.;Rezende,C.;Brandao,A.;Januzzi,P.;Cabrera,A. C. V.  | Survival analysis in an obstetric intensive care unit, according diagnosis at admission                                                                       | Journal of perinatal medicine                                                                        | 2011 | Conference abstract                           |
| Main, E. K., Abreo, A., McNulty, J., et al.                            | Measuring severe maternal morbidity: validation of potential measures                                                                                         | American Journal of Obstetrics and Gynecology                                                        | 2015 | Models not for predicting mortality           |
| Metcalf A; Lix LM; Johnson JA; Currie G; Lyon AW; Bernier F; Tough SC. | Validation of an obstetric comorbidity index in an external population                                                                                        | BJOG: An International Journal of Obstetrics and Gynaecology                                         | 2015 | No models investigated or comorbidity indexes |
| Michael Stephanou,A.                                                   | Validation of the modified early obstetric warning system (MEOWS)                                                                                             | Anaesthesia                                                                                          | 2012 | Models not for predicting mortality           |

|                                                                                                                                                                            |                                                                                                                                                                         |                                                                                                        |      |                                     |
|----------------------------------------------------------------------------------------------------------------------------------------------------------------------------|-------------------------------------------------------------------------------------------------------------------------------------------------------------------------|--------------------------------------------------------------------------------------------------------|------|-------------------------------------|
| Munnur,U.;Karnad,D. R.;Bandi,V. D. P.;Lapsia,V.;Suresh,M. S.;Ramshesh,P.;Gardner,M. A.;Longmire,S.;Guntupalli,K. K.                                                        | Critically ill obstetric patients in an American and an Indian public hospital: Comparison of case-mix, organ dysfunction, intensive care requirements, and outcomes    | Intensive care medicine                                                                                | 2005 | No Performance of Models Reported   |
| Nair,M.; Kurinczuk,J.J.; Knight,M.                                                                                                                                         | Establishing a National Maternal Morbidity Outcome Indicator in England: A Population-Based Study Using Routine Hospital Data                                           | PLOS ONE                                                                                               | 2016 | Models not for predicting mortality |
| Ortega Carnicer,J.;Ambros Checa,A.;Fernandez-Medina Criado,V.;Alegria,Ruiz De;Larramendi,Ruiz De;Miguel,Diarte De;Torrubia Chalmeta,R. Paxton,J. L.;Presneill,J.;Aitken,L. | Critical illness in pregnant patients. Spanish] Enfermedades criticas en pacientes obstetricas                                                                          | Medicina Intensiva                                                                                     | 1998 | No Performance of Models Reported   |
|                                                                                                                                                                            | Characteristics of obstetric patients referred to intensive care in an Australian tertiary hospital                                                                     | Australian and New Zealand Journal of Obstetrics and Gynaecology                                       | 2014 | No Performance of Models Reported   |
| Perez Assef,A.;Acevedo Rodriguez,O.;Del Consuelo,Tamayo Gomez;Oviedo Rodriguez,R.                                                                                          | Characterization of obstetric patients with multiple organ failure in the intensive care unit of a Havana Teaching Hospital, 1998 to 2006                               | MEDICC Review                                                                                          | 2010 | No Performance of Models Reported   |
| Stevens,T. A.;Carroll,M. A.;Promecene,P. A.;Seibel,M.;Monga,M.                                                                                                             | Utility of Acute Physiology, Age, and Chronic Health Evaluation (APACHE III) score in maternal admissions to the intensive care unit                                    | American Journal of Obstetrics and Gynecology                                                          | 2006 | No Performance of Models Reported   |
| Toufiki,R.; Mouaffak,Y.; El Adib, A. R.; Amine,M.                                                                                                                          | Which index severity to use in obstetric medium? (Comparison of 4 scores)                                                                                               | Annals of Intensive Care.Conference: French Intensive Care Society, International Congress Reanimation | 2016 | Conference abstract                 |
| Vasquez,D. N.;Das Neves,A. V.;Aphalo,V. B.;Loudet,C. I.;Roberti,J.;Cicora,F.;Casanova,M.;Canales,H. S.;Intile,A. D.;Scapellato,J. L.;Desmery,P. M.;Estenssoro,E.           | Health insurance status and outcomes of critically ill obstetric patients: A prospective cohort study in Argentina                                                      | Journal of critical care                                                                               | 2014 | Models not for predicting mortality |
| Witteveen,T.; De Koning, I.; Bezstarosti,H.; Van,Den Akker; Van Roosmalen, J.; Bloemenkamp,K.W.                                                                            | Validating the WHO Maternal Near Miss Tool in a high-income country                                                                                                     | Acta Obstetrica et Gynecologica Scandinavica                                                           | 2016 | No Performance of Models Reported   |
| You,W. B.;Chandrasekaran,S.;Sullivan,J.;Grobman,W.                                                                                                                         | Validation of a scoring system to identify women with near-miss maternal morbidity                                                                                      | American Journal of Perinatology                                                                       | 2013 | Models not for predicting mortality |
| Zuckerwise,L.C.; Lipkind,H.S.                                                                                                                                              | Maternal early warning systems- Towards reducing preventable maternal mortality and severe maternal morbidity through improved clinical surveillance and responsiveness | Seminars in Perinatology.                                                                              | 2017 | Review                              |
